# Supplementary material for: Adipocyte autophagy limits gut inflammation by controlling oxylipin and IL‐10
Source: PubMed Central journal article supplement (PMC10015370; doi:10.15252/embj.2022112202), 2023-02-16
Supplement: EMBJ-42-e112202-s004.pdf [file EMBJ-42-e112202-s004.pdf]

## Expanded View Figures

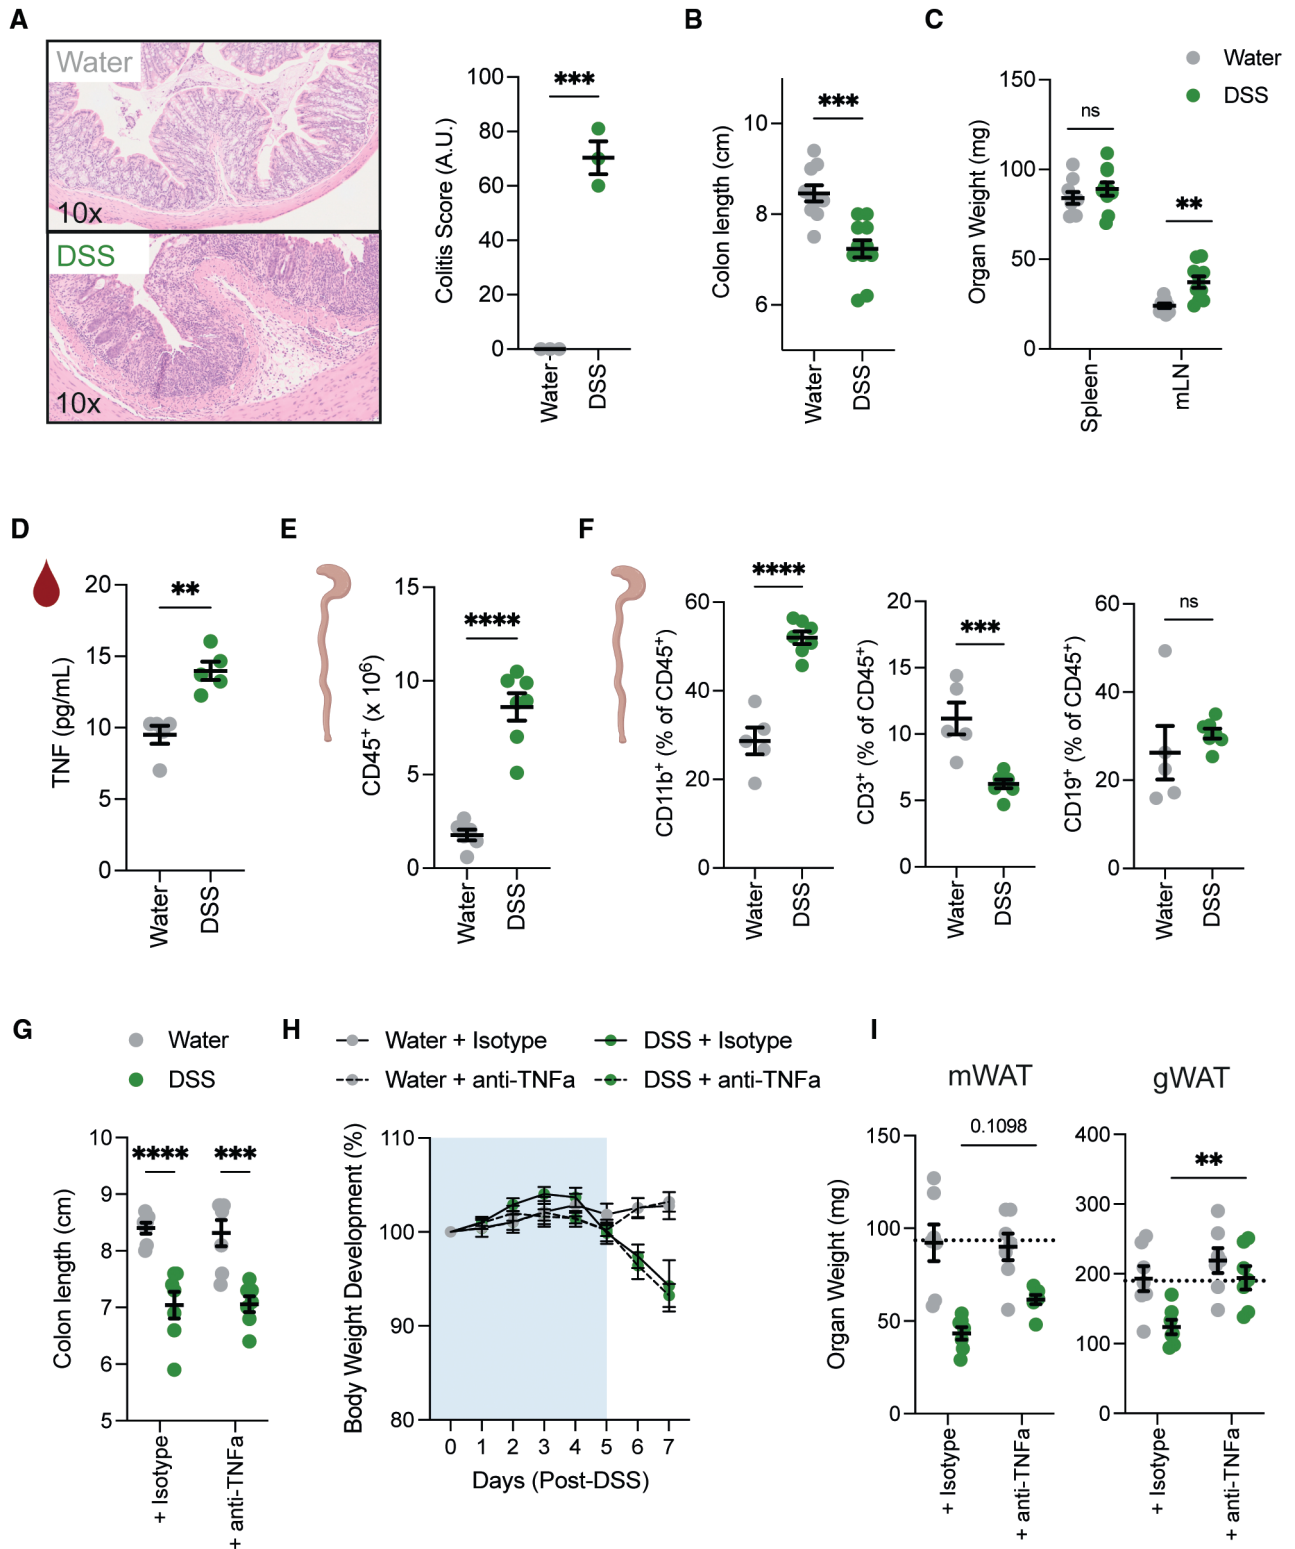

Figure EV1.

**Figure EV1. DSS leads to efficient induction of intestinal inflammation.**

- A Representative H&E staining of colon histology and quantification on day 7 after DSS colitis induction ( $n = 3/\text{group}$ ) from one independent experiment.
- B Colon length measured after 1.5–2% DSS colitis regime on day 7 ( $n = 10\text{--}11/\text{group}$ ).
- C Spleen weight and mesenteric lymph node weight after 1.5–2% colitis regime on day 7 ( $n = 9\text{--}10/\text{group}$ ).
- D TNF $\alpha$  levels in serum were measured in wild-type mice on day 7 after water and DSS treatment ( $n = 5/\text{group}$ ).
- E Absolute number of colonic CD45 $^{+}$  immune cells on day 7 post-DSS treatment ( $n = 6\text{--}7/\text{group}$ ).
- F Frequency of CD11b $^{+}$  myeloid cells, CD3 $^{+}$  T cells and CD19 $^{+}$  B cells in colon on day 7 post-DSS treatment ( $n = 5\text{--}7/\text{group}$ ).
- G Colon length of mice upon DSS-induced colitis treated with anti-isotype or anti-TNF $\alpha$  neutralizing antibody ( $n = 7/\text{group}$ ).
- H Body weight development upon DSS-induced colitis of mice treated either with anti-isotype or anti-TNF $\alpha$  neutralizing antibody ( $n = 7/\text{group}$ ).
- I Tissue weight of mWAT or gWAT upon DSS-induced colitis of mice treated either with anti-isotype or anti-TNF $\alpha$  neutralizing antibody ( $n = 7/\text{group}$ ).

Data are represented as mean  $\pm$  s.e.m. (A–E) Unpaired Student's *t*-test. (G, I) Two-way ANOVA. (H) Repeat-measure two-way ANOVA. \*\* $P < 0.01$ , \*\*\* $P < 0.001$ , \*\*\*\* $P < 0.0001$ .

Source data are available online for this figure.

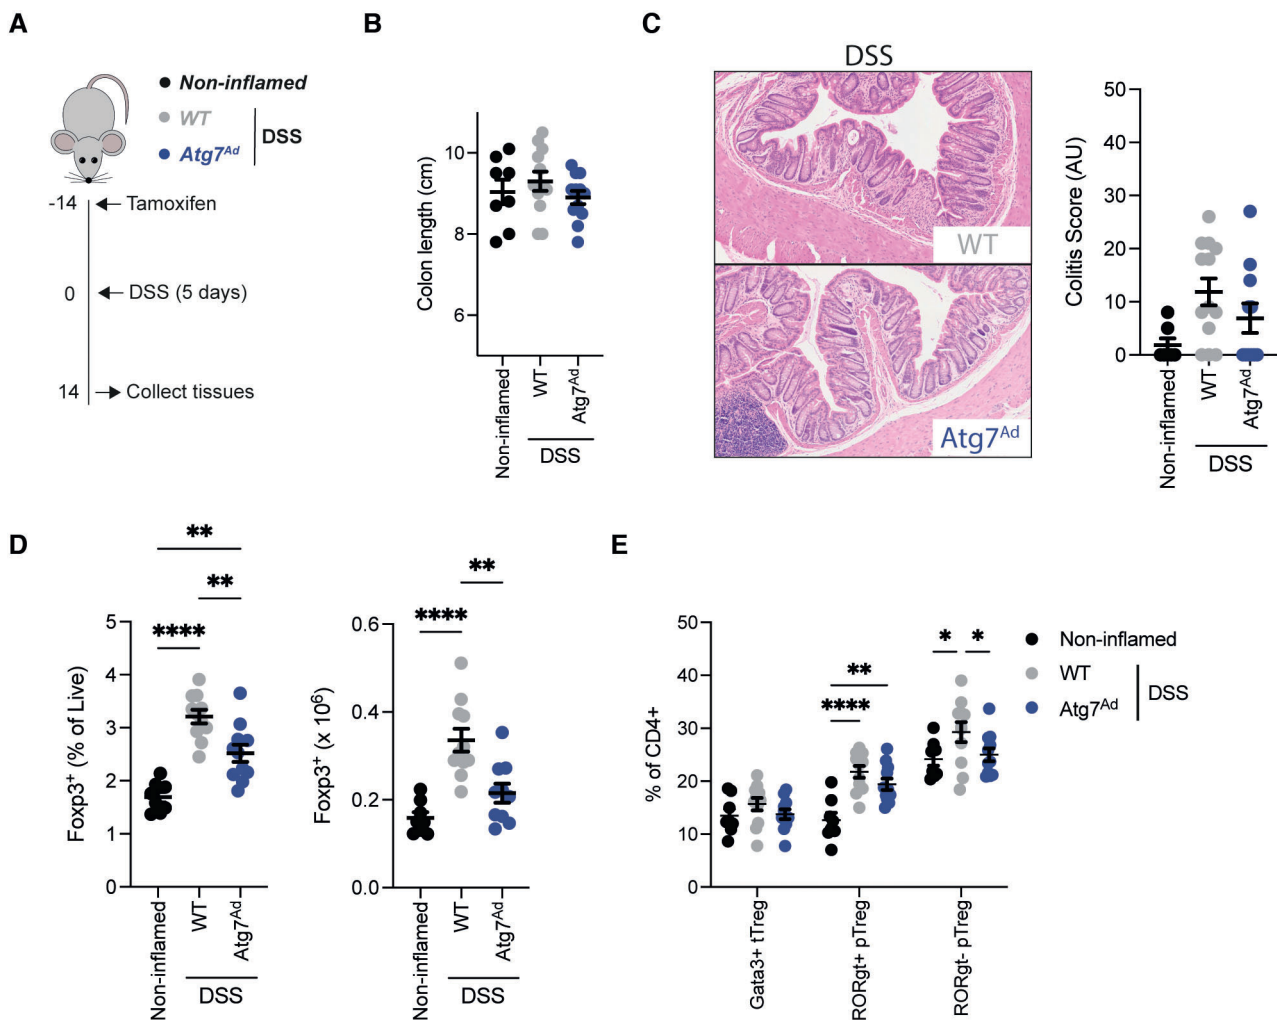

**Figure EV2.**

**Figure EV2. Expansion of intestinal Treg populations is blunted in adipocyte autophagy-deficient mice without affecting intestinal resolution.**

- A Schematic of experimental design. Sex-matched and age-matched littermates were treated with DSS for 5 days and mice were sacrificed 14 days after start of DSS treatment.
- B Colon length from noninflamed control mice ( $n = 8$ /group), adipocyte autophagy-sufficient WT mice and adipocyte autophagy-deficient mice ( $n = 12$ /group).
- C Representative H&E staining images (10 $\times$  magnification) of distal colon sections and quantification of histopathological score ( $n = 7$ –13/group).
- D Frequency (left panel) and absolute number (right panel) of CD4<sup>+</sup> FOXP3<sup>+</sup> cells in the colon on day 14 post-DSS treatment ( $n = 8$ –11/group).
- E Frequency of peripheral and thymic Treg (pTreg and tTreg, respectively) cell populations in colon on day 14 post-DSS treatment ( $n = 8$ –11/group).
- Data are represented as mean  $\pm$  s.e.m. (B–D) One-way ANOVA. (E) Two-way ANOVA. \* $P < 0.05$ , \*\* $P < 0.01$ , \*\*\*\* $P < 0.0001$ . Source data are available online for this figure.

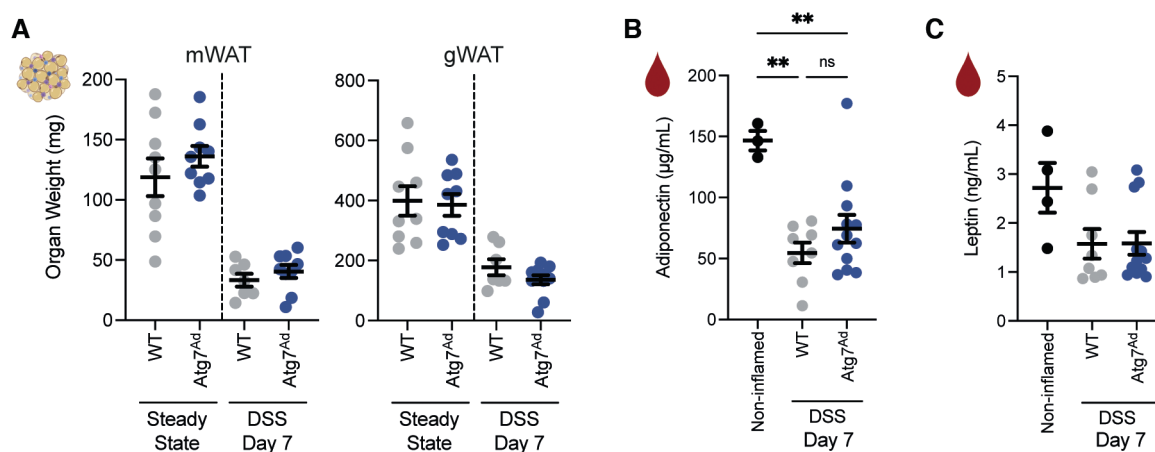**Figure EV3. Loss of adipocyte autophagy had no effects on adipose tissue and circulating levels of leptin and adiponectin.**

- A Adipose tissue mass at steady state and on day 7 post-DSS induction ( $n = 7$ –11/group).
- B Circulating levels of adiponectin ( $n = 3$ –12/group).
- C Circulating levels of leptin ( $n = 4$ –12/group).

Data are represented as mean  $\pm$  s.e.m. (A) Unpaired Student's  $t$ -test. (B, C) One-way ANOVA. \*\* $P < 0.01$ . Source data are available online for this figure.

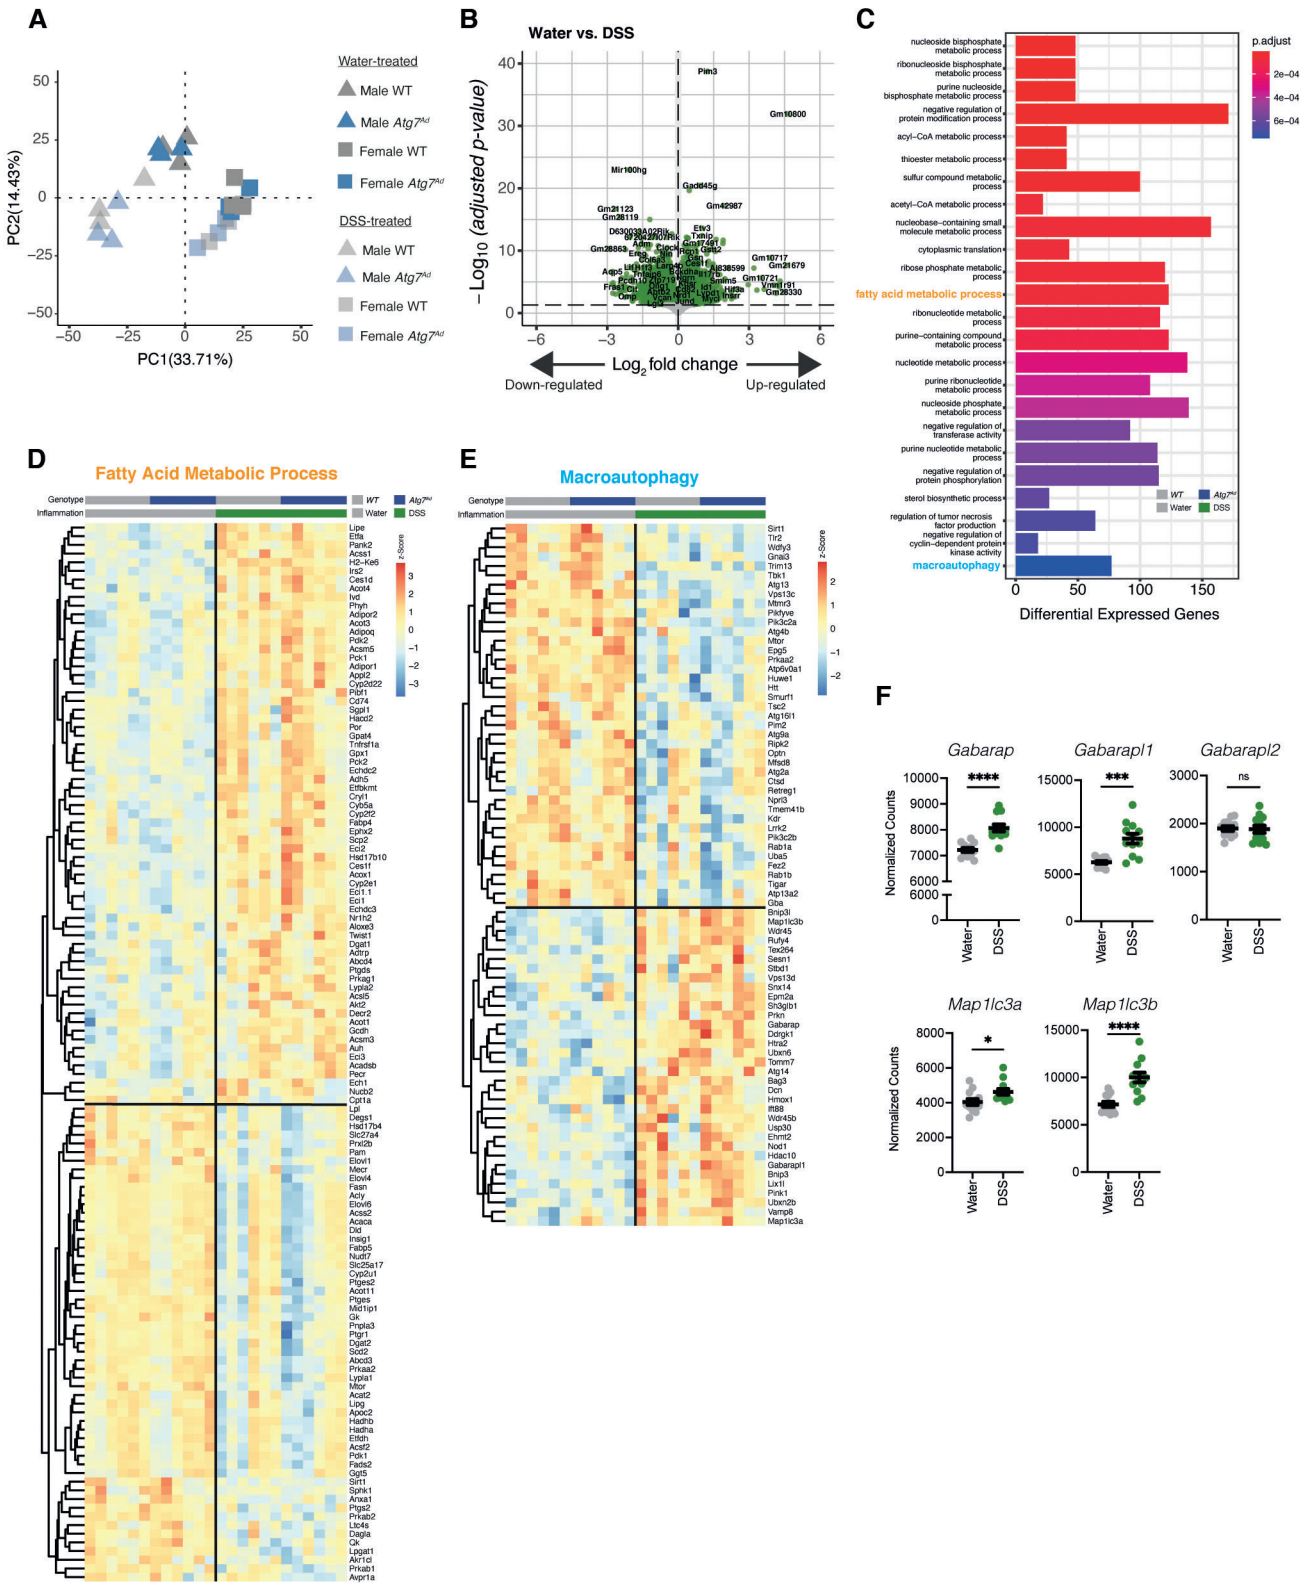

Figure EV4.

**Figure EV4. Intestinal inflammation induces distinct transcriptional programs in primary visceral adipocytes.**

- A Principal component analysis of all mice revealing a strong sex effect in the overall transcriptome.  
 B Differential gene expression assessing transcriptional changes associated with DSS-induced inflammation after regressing effect of sex and genotypes in visceral adipocytes.  
 C Pathway enrichment analysis of significantly differentially expressed genes in visceral adipocytes during DSS colitis.  
 D Heatmap representing differentially expressed genes associated in fatty acid metabolism during DSS-induced colitis in visceral adipocytes.  
 E Heatmap representing differentially expressed genes associated with macroautophagy during DSS-induced colitis in visceral adipocytes.  
 F Normalized counts of *Atg8* homologs in visceral adipocytes ( $n = 12/\text{group}$ ).

Data are represented as mean  $\pm$  s.e.m. (F) Unpaired Student's *t*-test. \* $P < 0.05$ , \*\*\* $P < 0.001$   
 Source data are available online for this figure.

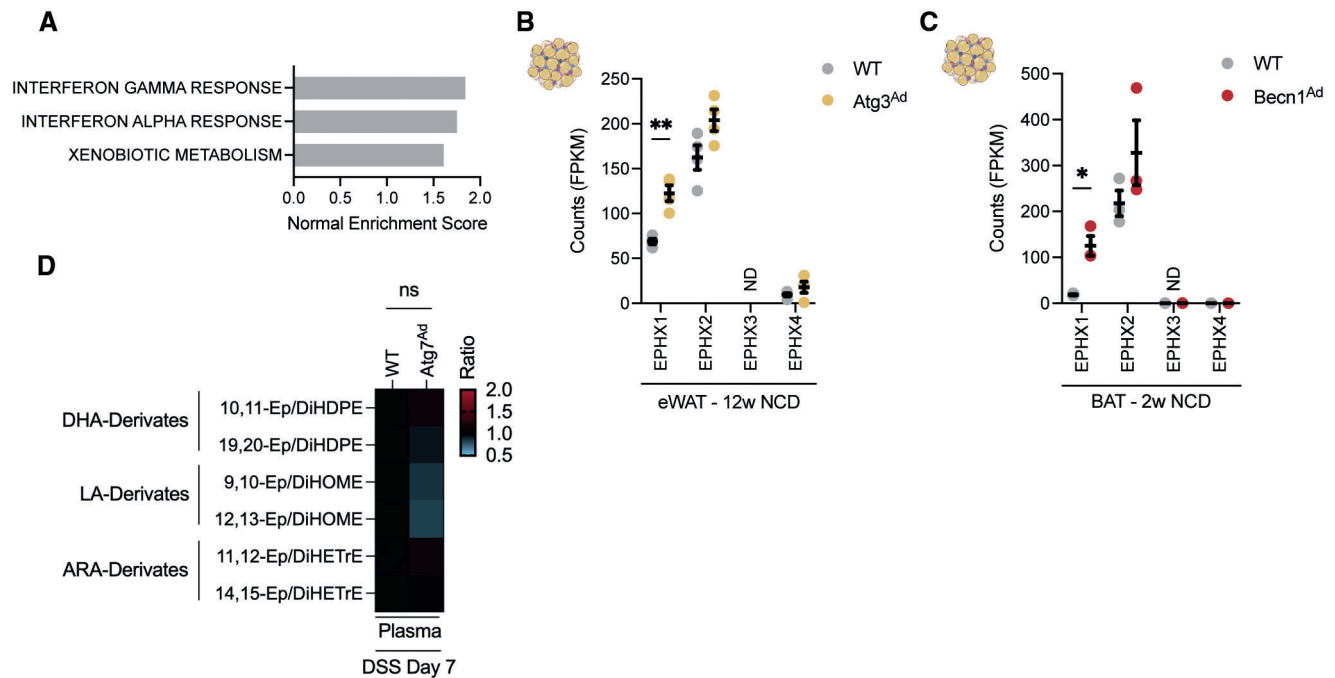**Figure EV5. Loss of autophagy-related genes results in the induction of epoxy hydrolases in adipocytes.**

- A GSEA enrichment analysis between *Atg7*-deficient and *Atg7*-sufficient adipocytes during DSS treatment.  
 B Fragments per kilobase of exon per million mapped fragments (FPKM) counts from bulk RNAseq dataset of Cai et al (2018) ( $n = 4/\text{group}$ )  
 C Fragments per kilobase of exon per million mapped fragments (FPKM) counts from bulk RNAseq dataset of Son et al (2020) ( $n = 3/\text{group}$ ).  
 D Normalized ratios of epoxy fatty acid precursors to their corresponding diol fatty acids pairs in plasma ( $n = 8/\text{group}$ ).

Data are represented as mean  $\pm$  s.e.m. (B, C) Unpaired Student's *t*-test. (D) Two-way ANOVA. \* $P < 0.05$ , \*\* $P < 0.01$ .  
 Source data are available online for this figure.
