# Supplementary material for: Adipocyte autophagy limits gut inflammation by controlling oxylipin and IL‐10
Source: PubMed Central journal article supplement (PMC10015370; doi:10.15252/embj.2022112202), 2023-02-16

## Table of Content

Appendix Figure S1

### Figure Legend

***Appendix Figure S1: Adipocyte autophagy loss results in shifts of macrophage polarization.***

(A) Frequency of adipose tissue macrophages among all immune cells in adipose tissues (n = 7-9/group).

(B) Expression of CD206 on adipose tissue macrophages in visceral adipose tissues (n = 6-12/group).

(C) Expression of CD36 on adipose tissue macrophages. Dotted line represents uninflamed controls (n = 5-7/group).

Data are represented as mean  $\pm$  s.e.m. (A-C) Unpaired Student's t-test.

# Appendix Figure S1

**A**

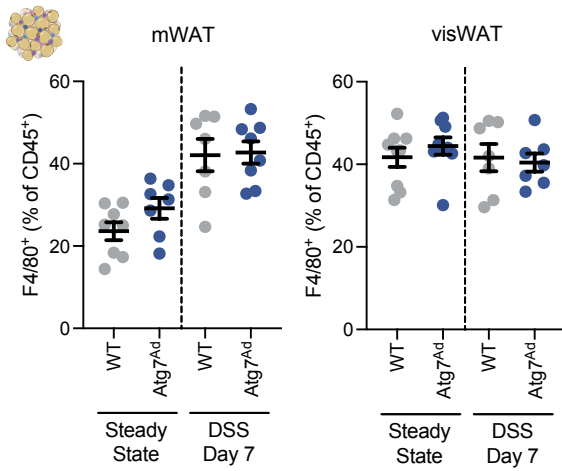

**B**

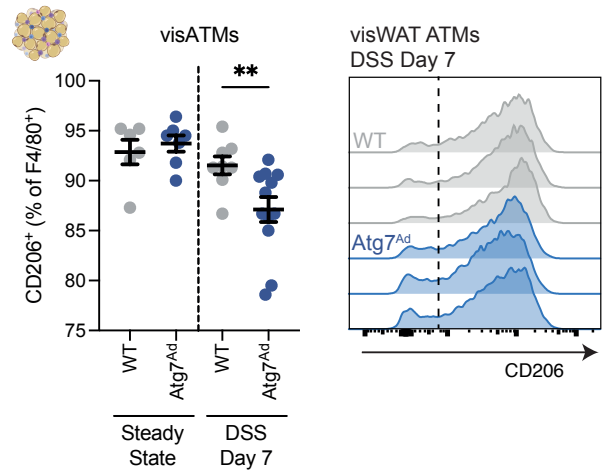

**C**

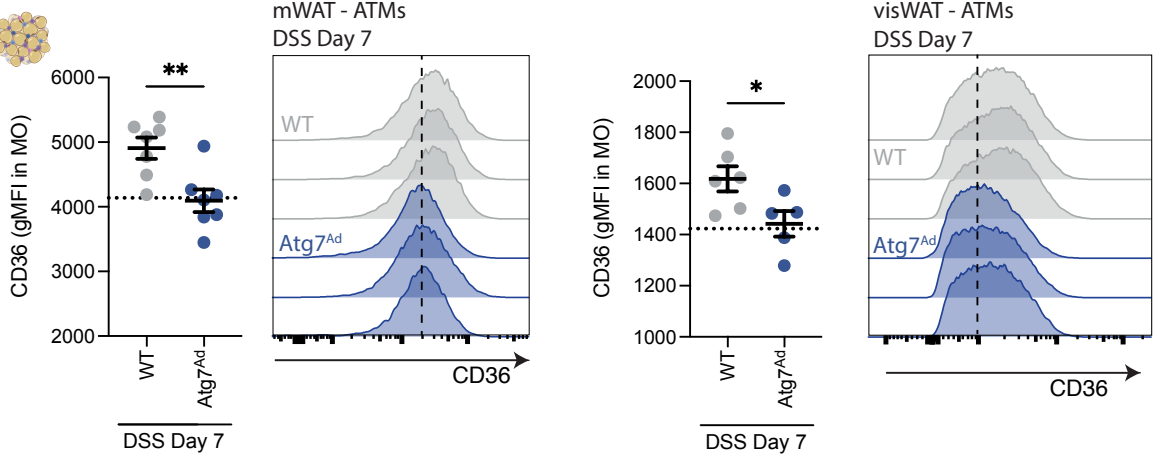

Supplement: EMBJ-42-e112202-s007.pdf [file EMBJ-42-e112202-s007.pdf]
